# Supplementary material
Source: publisher figshare collection journal article supplement (https://gsajournals.figshare.com/ndownloader/files/12389003)
Supplement: Supplementary file 1 [file 12389003]

## Sheet: Sheet1
Table S3: GAGE statistics from QUAST for all release 6 contigs.
Statistic	dbg2olc	canu	qm2x	bionano	Koren et al.	miniasm
# contigs (>= 0 bp)	339	295	250	231	340	208
# contigs (>= 1000 bp)	339	295	250	231	340	208
# contigs (>= 5000 bp)	332	290	245	226	340	203
# contigs (>= 10000 bp)	290	280	235	216	339	190
# contigs (>= 25000 bp)	169	242	196	177	318	164
# contigs (>= 50000 bp)	110	186	140	121	173	122
Total length (>= 0 bp)	134109164	140720404	140153080	142817829	155249450	131856353
Total length (>= 1000 bp)	134109164	140720404	140153080	142817829	155249450	131856353
Total length (>= 5000 bp)	134085504	140700014	140132767	142797516	155249450	131838305
Total length (>= 10000 bp)	133764125	140619295	140052013	142716762	155242096	131746203
Total length (>= 25000 bp)	131794052	139931038	139341662	142006411	154810349	131269656
Total length (>= 50000 bp)	129790363	137838862	137243689	139908438	149452040	129761889
# contigs	339	295	250	231	340	208
Largest contig	13397870	14484027	25783280	28580427	25783144	16991501
Total length	134109164	140720404	140153080	142817829	155249450	131856353
Reference length	143726002	143726002	143726002	143726002	143726002	143726002
GC (%)	41.99	41.97	41.98	41.98	41.74	42.13
Reference GC (%)	42.01	42.01	42.01	42.01	42.01	42.01
N50	10113899	3004953	18923871	21305147	13340754	3866686
NG50	10113899	2880153	18923871	19450931	21708276	3287195
N75	1957513	1053116	18127341	18923871	1532388	1782891
NG75	1384439	1020541	5103630	18923871	2748875	976707
L50	6	11	4	3	4	9
LG50	6	12	4	4	3	10
L75	14	28	5	5	14	21
LG75	18	30	6	5	10	27
# misassemblies	732	1138	1205	1186	2911	NA
# misassembled contigs	192	203	177	168	282	NA
Misassembled contigs length	127734169	118649832	133073098	136930422	152246971	NA
# local misassemblies	1421	1404	1333	1315	2606	NA
# unaligned mis. contigs	29	12	14	15	10	70
# unaligned contigs	0 + 150 part	4 + 115 part	4 + 113 part	4 + 113 part	3 + 137 part	48 + 160 part
Unaligned length	1164048	1146163	1196686	3864483	1727661	131732767
Genome fraction (%)	90.495	92.903	92.795	92.796	96.624	0.071
Duplication ratio	1.022	1.045	1.042	1.042	1.105	1.204
# N's per 100 kbp	0.05	0	0	1865.84	0	0
# mismatches per 100 kbp	17.47	20.54	21.2	21.34	26.15	1672.58
# indels per 100 kbp	33.83	35.38	35.97	35.56	12.5	2097.3
Largest alignment	5143182	4253126	4253175	4253175	6493896	2412
Total aligned length	132932477	139538974	138931007	138955127	153410174	123934
NA50	805994	1190224	1108731	1082635	1349461	NA
NGA50	754219	1144019	1082635	1082635	1650623	NA
NA75	428137	458864	458957	428175	412054	NA
NGA75	313326	433805	414538	422978	670279	NA
LA50	46	34	37	38	28	NA
LGA50	52	35	38	38	24	NA
LA75	100	81	84	88	76	NA
LGA75	120	86	90	89	60	NA
Contigs #	339	295	250	231	340	208
Min contig	1632	2985	2985	2985	7354	1172
Max contig	13397870	14484027	25783280	28580427	25783144	16991501
Not corrected N50	10113899 COUNT: 6	2880153 COUNT: 12	18923871 COUNT: 4	19450931 COUNT: 4	21708276 COUNT: 3	3287195 COUNT: 10
Genome size	143726002	143726002	143726002	143726002	143726002	143726002
Assembly size	134109164	140720404	140153080	142817829	155249450	131856353
Chaff bases	0	0	0	0	0	0
Missing reference bases	4128353(2.87%)	3270761(2.28%)	3343041(2.33%)	3343188(2.33%)	1594387(1.11%)	139571571(97.11%)
Missing assembly bases	927285(0.69%)	751817(0.53%)	794081(0.57%)	3459677(2.42%)	1045197(0.67%)	130402720(98.90%)
Missing assembly contigs	0(0.00%)	4(1.36%)	4(1.60%)	4(1.73%)	3(0.88%)	6(2.88%)
Duplicated reference bases	5741010	9579231	9391890	9339183	19139018	345745
Compressed reference bases	13828139	10514360	11003615	10942127	3974202	3298942
Bad trim	732692	666657	667012	2914992	850088	20227707
Avg idy	0.9994	0.9994	0.9994	0.9994	0.9998	0.959
Avg idy (phred scale)	32.22	32.22	32.22	32.22	36.99	13.87
SNPs	11820	12028	12608	12568	7373	15429
Indels < 5bp	50317	52502	52926	53022	10682	29401
Indels >= 5	3494	2816	3164	3172	360	1712
Inversions	48	38	44	40	28	299
Relocation	462	337	420	443	196	462
Translocation	625	895	900	888	1302	3488
Corrected contig #	4317	3643	3982	3991	1849	95
Corrected assembly size	128841763	132540489	132123844	132152910	139761342	136174
Min correct contig	1000	1000	1000	1000	1001	1000
Max correct contig	447525	478067	418235	418235	4180493	4203
Corrected N50	54446	78968	71671	71671	768400	NA
COUNT	679	493	532	532	49	NA
NA indicates that QUAST returned a report successfully, but returned some non informative GAGE statistics. Multiple attemts to rerun the reports also failed.
